# Supplementary material for: Vacancy-induced manganese vanadates and their potential application to Li-ion batteries
Source: Royal Society of Chemistry journal article supplement (doi:10.1039/c6cc02249a), 2016-01-01
Supplement: c6cc02249a1.pdf [file c6cc02249a1.pdf]

## Electronic Supplementary Information

### Vacancy-Induced Manganese Vanadates and Their Potential Application to Li-ion Batteries

Martin K. Dufficy, Lan Luo, Peter S. Fedkiw, Paul A Maggard

#### Section 1. Materials and Instrumentation.

All reagents were used as supplied by the manufacturer without further purification, including:  $\text{Mn}(\text{NO}_3)_2 \cdot n\text{H}_2\text{O}$  (99.98%, Alfa Aesar),  $\text{Co}(\text{NO}_3)_2 \cdot 6\text{H}_2\text{O}$  (98.0%, Alfa Aesar), and  $\text{NH}_4\text{VO}_3$  (99.99%, Aldrich). Deionized water was used as a reagent in each hydrothermal reaction. The inactive electrode materials consisted of Super P Li (Timcal Graphite & Carbon) and carboxymethyl cellulose (Sigma Aldrich). The electrolyte comprised 1 M lithium hexafluorophosphate salt ( $\text{LiPF}_6$ , BASF) dissolved in ethylene carbonate (EC, 99% pure, Sigma Aldrich) and ethyl methyl carbonate (EMC, Ferro Corp.) 1:1 wt% mixture. Electrolyte solvents were dried in molecular sieves (4Å, Sigma Aldrich) to a water content < 10 ppm. A 25- $\mu\text{m}$  thick separator (Celgard) was used to prevent contact between the working electrode and the Li counter/reference electrode (Sigma Aldrich).

High-resolution Powder XRD data were collected on a RIGAKU R-Axis Spider Powder X-ray diffractometer (graphite monochromatized Cu  $K\alpha$  radiation) at room temperature. Powder X-ray diffraction patterns were scanned with a step size of  $0.02^\circ$  over the  $2\theta$  angular range from  $4^\circ$  to  $100^\circ$  and dwell times of 4 s for each step. Thermogravimetric analyses were taken on a TA Instruments TGA Q50 by loading ~5.0 mg onto a platinum pan. The pan was equilibrated and tared at room temperature and heated to  $600^\circ\text{C}$  at a rate of  $5^\circ\text{C}/\text{min}$  in air. The post-heated TGA residues were characterized by powder XRD, as described above. Specific surface areas of **I** was measured on a Quantachrome ChemBET Pulsar TPR/TPD. Samples were preheated to  $140^\circ\text{C}$  under flowing  $\text{N}_2$  to degas for 3 h, and then cooled with liquid nitrogen and analyzed using a 30%  $\text{He}/\text{N}_2$  gas mixture. Both pre-cycled and post-cycled electrodes were imaged on an FEI Verios 460L field-emission scanning electron microscope (FESEM). In a glovebox, post-cycled cells were decrimped, and the working electrode was washed with EMC and dried; exposure to air was limited to the FESEM sample loading. Half-cell cycling experiments were performed on an Arbin BT-2000 while cyclic voltammetry (CV) and electrochemical impedance spectroscopy (EIS) experiments were performed on a Bio-Logic VMP3.

## Section 2. Experimental Section.

1. *Synthetic Procedures.*  $\text{Mn}_{1.5}(\text{H}_2\text{O})(\text{NH}_4)\text{V}_4\text{O}_{12}$  (**I**) was synthesized by mixing of 0.0367 g  $\text{Mn}(\text{NO}_3)_2 \cdot n\text{H}_2\text{O}$ , 0.0400 g  $\text{NH}_4\text{VO}_3$ , and ~1 mL  $\text{H}_2\text{O}$  in a molar ratio of 1:2:~300 into a polytetrafluoroethylene Teflon pouch (3" × 3") that was then heat sealed in air. The pouch was placed into a 125 mL polytetrafluoroethylene-lined stainless-steel autoclave that was backfilled with ~40 mL deionized water before closing. The reaction vessel was heated to 130°C for 72 h in a convection oven, then subsequently slowly cooled to room temperature at a rate of 6°C/h. The products were washed with deionized water, collected, and dried at 60°C overnight. Small brown needlelike crystals were obtained in a yield of ~70.0% (based on vanadium). **I** was obtained in high phase purity (> 95%) according to powder X-ray diffraction data in **Figure 1**.

2. *Crystal Structure.* Crystallographic data with specific bond lengths of **I** are listed in **Table S1**, and CCDC No. 1477963 contains additional crystallographic data for this manuscript. This may be obtained free of charge at [www.ccdc.cam.ac.uk/conts/retrieving.html](http://www.ccdc.cam.ac.uk/conts/retrieving.html).

3. *Electrode Fabrication and Characterization.* A slurry comprising 70 wt% **I**, 20 wt% carbon black, and 10 wt% binder was cast on Cu foil. Slurries were cast using the doctor-blade method to a desired thickness (25 or 50  $\mu\text{m}$ , corresponding to 1 or 2  $\text{mg cm}^{-2}$  of **I**, respectively). The resulting electrode film was dried in a convection oven at 40°C, punched into 1  $\text{cm}^2$  disks, and dried in a vacuum oven at 110°C overnight. The disks were placed as the working electrode vs Li metal in 2032 coin-cells. The electrolyte was added via pipette onto the working electrode (~50  $\mu\text{L}$ ) and the separator (~50  $\mu\text{L}$ ). A spacer and spring were placed on top of Li metal and the coin-cell was hermetically crimped. Half-cells were given a 24 hour rest period at open circuit prior to electrochemical characterization. We defined the capacity of the half-cells such that a 1-C rate corresponds to 1.2  $\text{A g}^{-1}$ . All half-cells were cycled between 10 mV and 3 V vs. Li/Li<sup>+</sup>. A formation cycle (one cycle at C/24) was applied to all half-cells prior to electrochemical performance assessments. The capacity for **I** electrodes at various rates (as presented in **Figure 3b** of the text) was determined using the 10<sup>th</sup> cycle in an experiment. Potentiostatic impedance experiments were performed between 100 kHz and 100 mHz using an amplitude of 10 mV. Prior to running EIS, half-cells were (dis)charged using a current density of 10  $\text{mA g}^{-1}$  to a specified voltage followed by constant voltage until a current of C/100.

4. Estimating amount [mol] of Li inserted on first lithiation.

$$x \frac{\text{mol}_{\text{Li}}}{\text{mol}_{\text{active}}} = C \left[ \frac{\text{mAh}}{g_{\text{active}}} \right] \cdot \frac{MW \left[ \frac{g_{\text{active}}}{\text{mol}_{\text{active}}} \right]}{F \left[ \frac{\text{mAh}}{\text{mol}_{\text{Li}}} \right]}$$

where:  $x$ : mols inserted on initial cycle

$C$ : capacity on initial cycle

$MW$ : molecular weight of **I**

$F$ : Faraday's constant

$$x \frac{\text{mol}_{\text{Li}}}{\text{mol}_{\text{active}}} = 1600 \left[ \frac{\text{mAh}}{g_{\text{active}}} \right] \cdot \frac{296.15 \left[ \frac{g_{\text{active}}}{\text{mol}_{\text{active}}} \right]}{2.6801e4 \left[ \frac{\text{mAh}}{\text{mol}_{\text{Li}}} \right]} ; x \approx 17.7 \frac{\text{mol}_{\text{Li}}}{\text{mol}_{\text{active}}}$$

5. *Ex-Situ Electrode Characterization.* Half-cells were charged/discharged using a constant current-constant voltage technique; constant currents of 10 mA g<sup>-1</sup> were applied to **I** electrodes to reach voltages labeled in **Figure 2a** of the text, followed by constant voltage until a current of C/100. The cell was transferred into the glovebox where it was deprimed, washed with EMC, and vacuum dried overnight at room temperature. Still in the glovebox, the electrode material was scraped off the copper foil current collector, milled in a mortar and pestle, and sealed in a capillary to prevent contact with air. Powder XRD was run on the samples. The electrode material from *ex-situ* PXRD analysis, described above, was heated to 600°C in air at a heat rate of 5°C min<sup>-1</sup>.

6. *Thermogravimetric analysis.* Shown in Figure S1, **I** exhibited one weight-loss step for the structural water and the ammonium ion. Using a heating rate of 5°C min<sup>-1</sup>, we observed removal of water and ammonium ions starting at ~200°C to 320°C. After the removal of water and ammonia, **I** is decomposed into MnV<sub>2</sub>O<sub>6</sub> and V<sub>2</sub>O<sub>5</sub>, as confirmed by PXRD in the Figure S10. The overall reaction is:

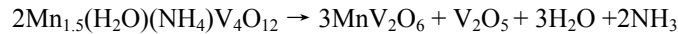

(exp. 8.57%, calcd. 8.56%).

7. *Infrared spectra.* The infrared spectrum of **I**, Figure S2, shows broad absorption bands in the 400 to 1200 cm<sup>-1</sup> range, arising from V-O and Mn-O vibrations. Broad peaks around 3300-3500 cm<sup>-1</sup> are consistent with the O-H stretching. Notably, two sharp peaks at 1579 cm<sup>-1</sup> and 1400 cm<sup>-1</sup> correspond to the bending mode of H<sub>2</sub>O and

$\text{NH}_4^+$ , respectively, as confirmed with the infrared spectra of  $\text{H}_2\text{O}$  and  $\text{NH}_3\cdot\text{H}_2\text{O}$ .<sup>1</sup> Neither the characteristic peaks of  $\text{H}_3\text{O}^+$  at  $1715\text{ cm}^{-1}$  and  $2150\text{ cm}^{-1}$ , nor  $\text{NH}_3$  molecules at  $1205\text{ cm}^{-1}$  were observed.<sup>1</sup> Therefore, **I** contains both coordinating water molecules and  $\text{NH}_4^+$  ions.

### Section 3. Figures and Tables

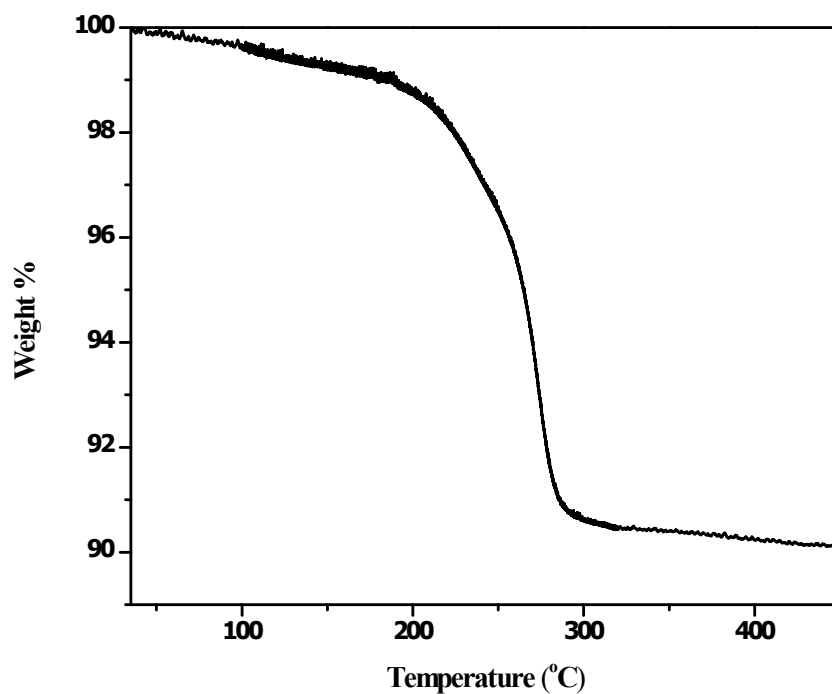

**Figure S1.** Thermogravimetric analysis for **I** in air plotted as weight (%) versus temperature (°C).

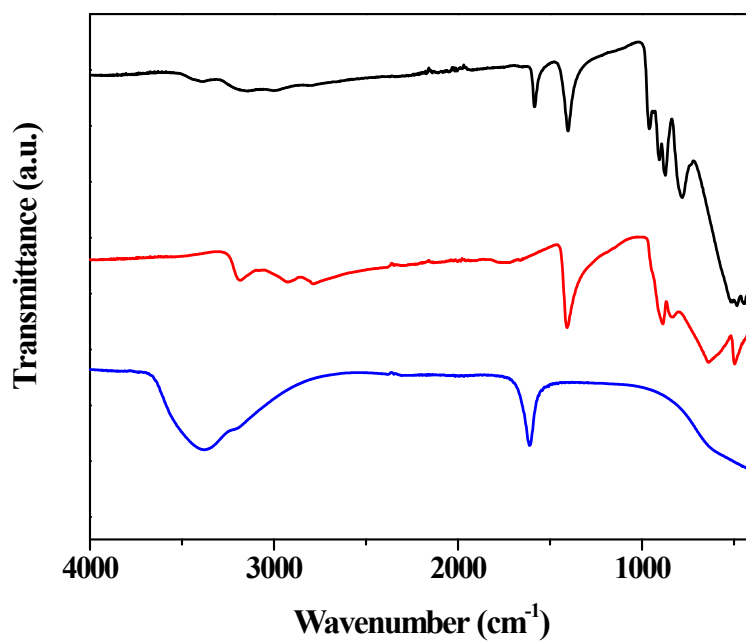

**Figure S2.** Infrared spectra of **I** (black), H<sub>2</sub>O (blue), and NH<sub>3</sub>H<sub>2</sub>O (red).

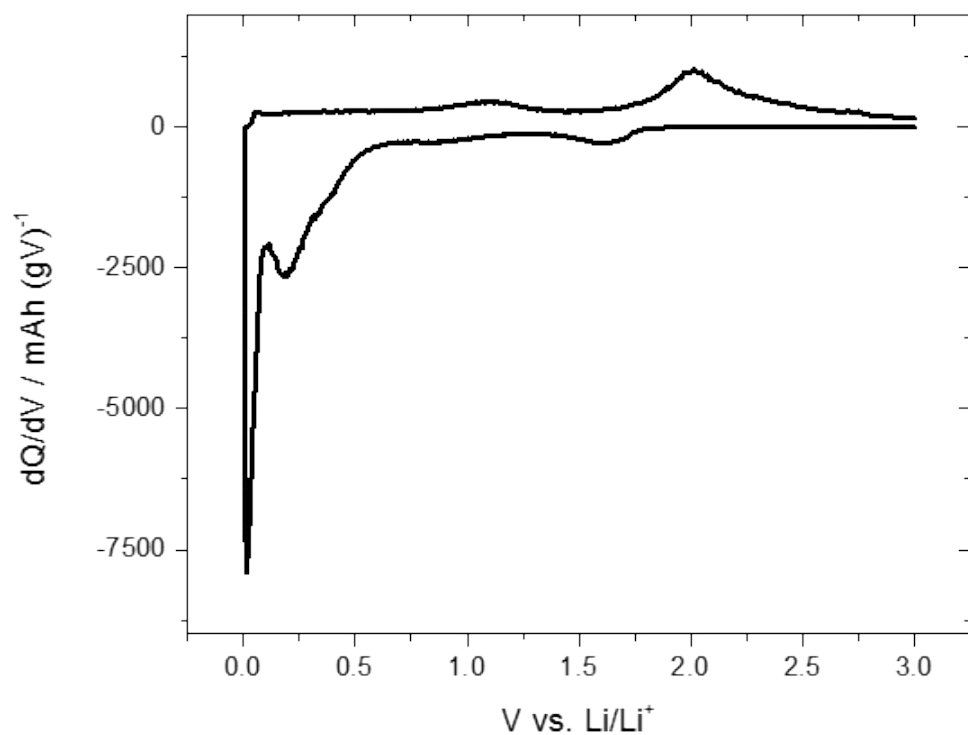

**Figure S3.** Typical (dis)charge capacity curve derivative profile from constant-current cycling at  $10 \text{ mA g}^{-1}$ . Peaks denote phase changes that were used for *ex-situ* PXRD studies.

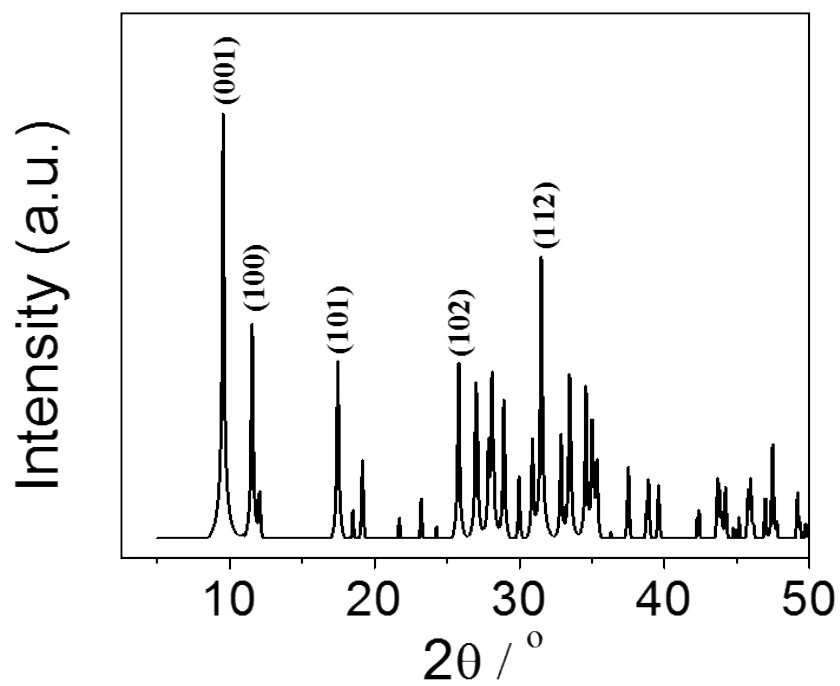

**Figure S4.** The calculated XRD spectrum of **I**, which agrees with the synthesized structure and proves we created a high-purity, single phase material.

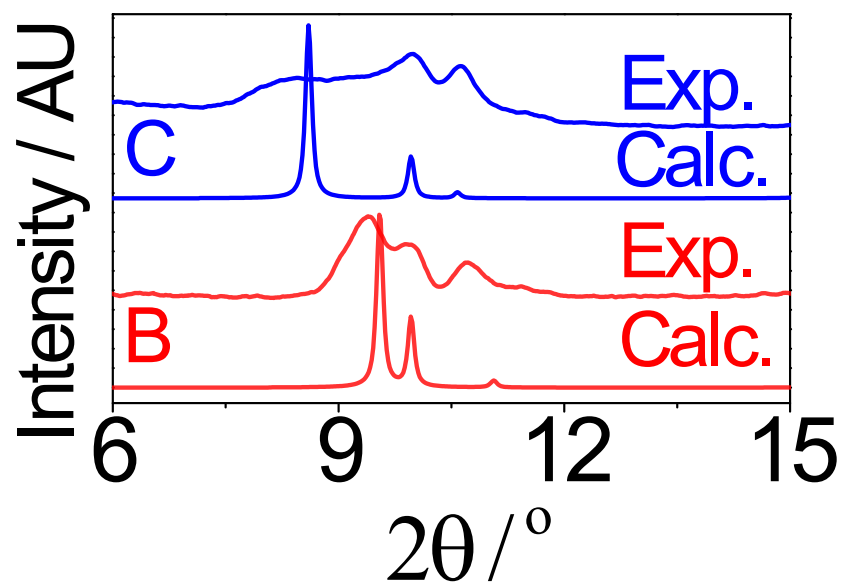

**Figure S5.** The empirical and simulated low-angle PXRD patterns for **I** electrodes that were lithiated to points **C** and **D**, as described in the text.

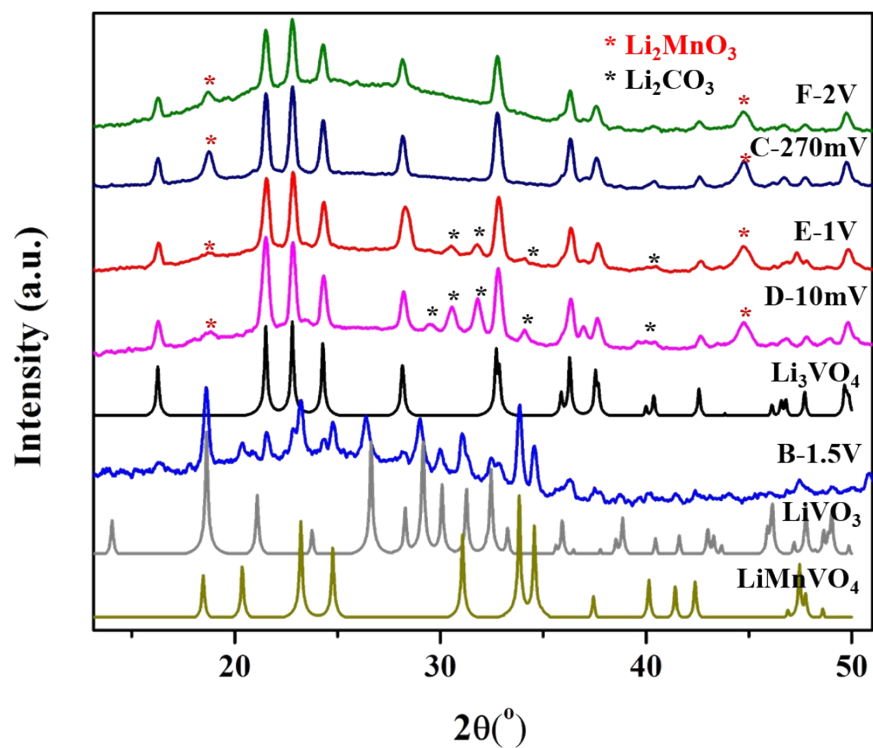

**Figure S6.** Powder XRD pattern of the thermogravimetric analysis residue for **I** electrodes after charge/discharge cycling and stopped at different voltages, and their assignments. The XRD pattern of **D** revealed a larger presence of  $\text{Li}_2\text{CO}_3$  (decomposed SEI material) at 10 mV than 270 mV, indicating that SEI formation occurred at low potentials vs.  $\text{Li}/\text{Li}^+$ .



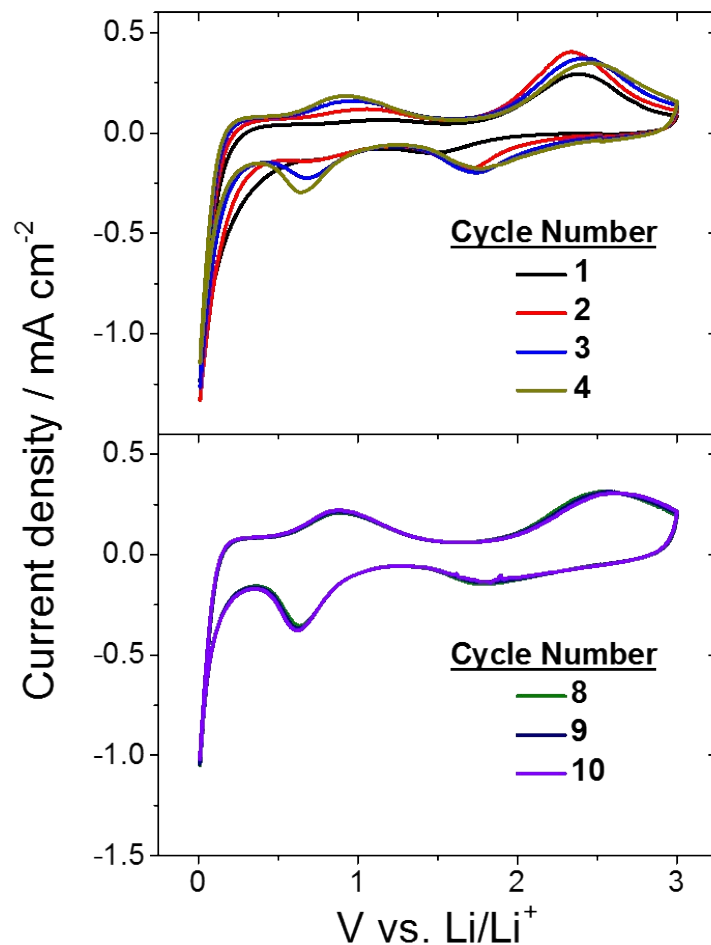

**Figure S7.** Cyclic voltammetry (CV) on **I** electrodes showing the initial cycling (top) and later cycles (bottom). The first cycle shows single cathodic polarization peak (intercalation) at a potentials near the onset of Li-ion reduction and a single anodic polarization peak (deintercalation) at 2.38 V vs. Li/Li<sup>+</sup>. As the cycling progresses, we see a changing voltammogram, as evidence of irreversible reactions and structural rearrangement within **I**; new cathodic peaks arise at ~1.71 and 0.65 V vs. Li/Li<sup>+</sup> and new anodic peaks arise at ~0.93 vs. Li/Li<sup>+</sup>. We also see a decrease in cathodic peak current as cycling progresses, which we attribute to Mn dissolution. Peak position becomes constant in later cycles (cycles 8-10) as **I** rearranges into a structure that is stable for (de)intercalation. A scan rate of 0.1 mV s<sup>-1</sup> was used.

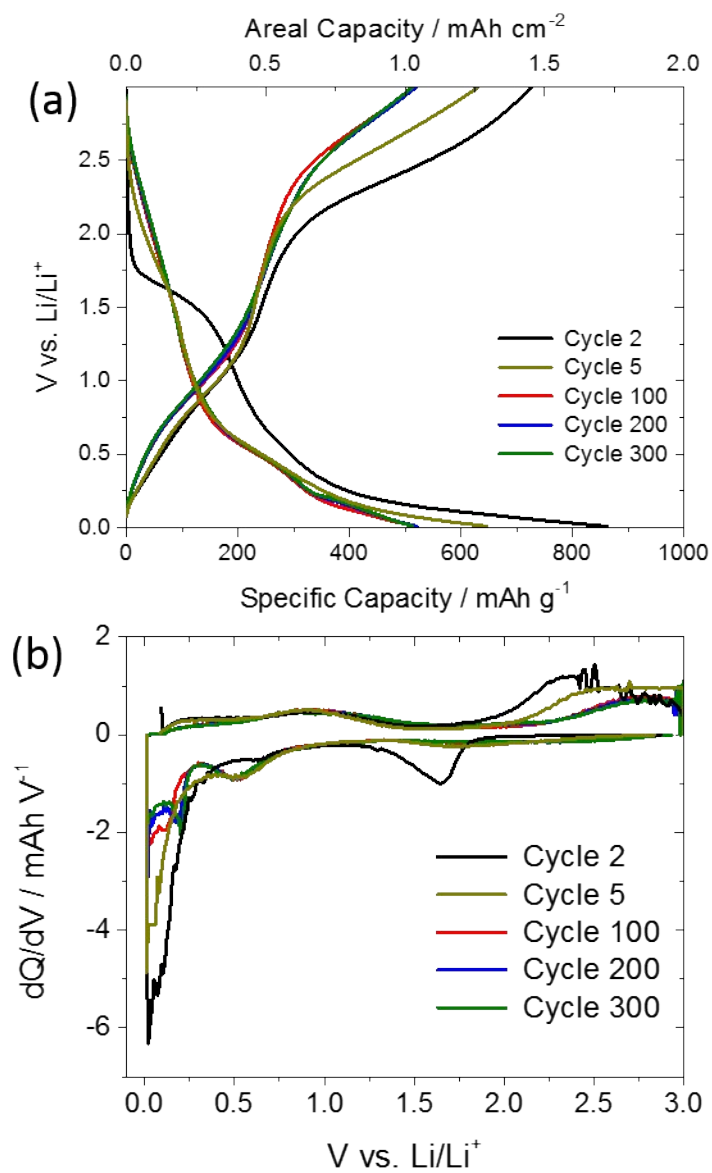

**Figure S8.** Select half-cell cycling profiles of **I** electrodes, showing (a) the charge/discharge curves and the corresponding (b) derivatives of the charge/discharge curves over 300 cycles. Low-voltage intercalation peaks in (b) decrease in magnitude due to Mn dissolution, however, we observed no significant decrease in low-voltage peak magnitude between cycles 100 and 300.

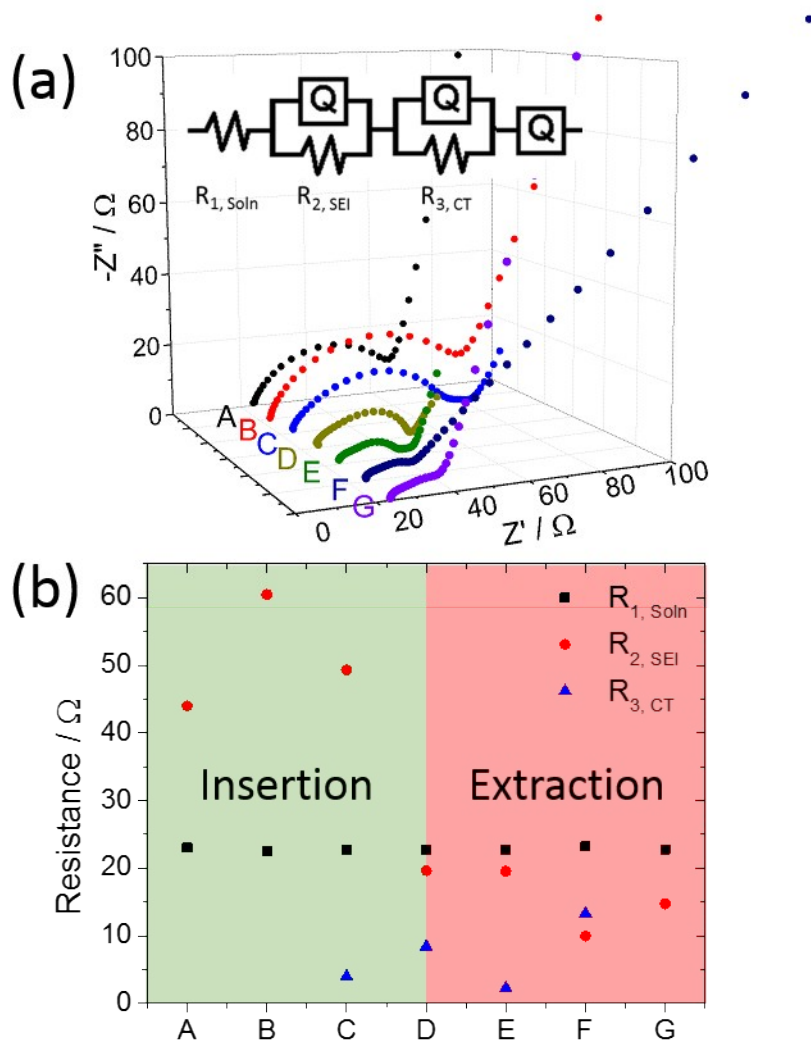

**Figure S9.** Impedance data for **I** electrodes showing a) Nyquist plots as a function of state-of-charge (SOC) with the equivalent circuit used to fit impedance data; b) values for the resistors when fitting the Nyquist plot to the model equivalent circuit. During the first cycle, the high-frequency resistance values stay constant, which indicates that Mn-ion that may have dissolved in the electrolyte, do not increase the solution resistance. The mid-frequency resistance, corresponding to film resistance from the SEI, decreased in half from points **C** to **D**, or from  $\sim 50 \Omega$  at 250 mV to  $\sim 19 \Omega$  at 10 mV. The reduction in R2 value with SOC may be associated with decomposition of electrolyte to form a more conductive SEI, as seen in graphite electrodes with similar electrolyte.<sup>2</sup> Upon delithiation, the SEI values do not increase beyond the fully charged state, indicating that a stable SEI has formed. Values of the low-frequency resistance, R3, correspond to the charge transfer resistance. The charge transfer resistance is dependent on mols Li in **I** and diffusivity of Li in **I**. Since the concentration of Li in **I** is high at **D** (near full lithiation after chronoamperometry at 10 mV until C/100, as detailed in the *Experimental Section* above), we see the charge transfer resistance increase due to a lower driving force from the concentration gradient. Charge transfer resistances are large before major Li-insertion at **C** and near full Li-extraction at **G**, and therefore not shown in (b).

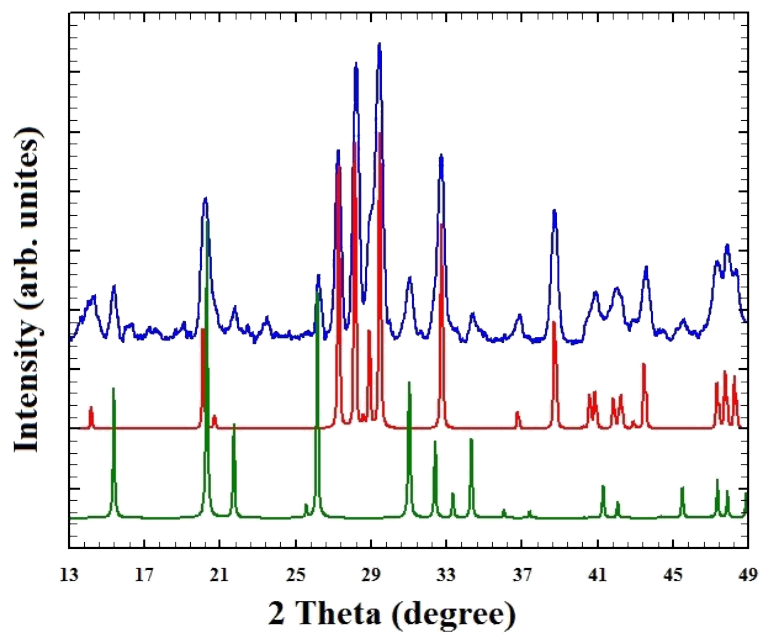

**Figure S10.** Powder XRD pattern of the TGA residue of **I** after heating in nitrogen (blue), and the calculated MnV<sub>2</sub>O<sub>6</sub> pattern (red) and the calculated V<sub>2</sub>O<sub>5</sub> pattern (green).

## Tables

**Table S1.** Selected bond distances, angles, and bond valence sums for **I** <sup>a</sup>

| Atom1 | Atom2           | Distance [Å] | Intra-Polyhedral Angle [°] |           |
|-------|-----------------|--------------|----------------------------|-----------|
| Mn1   | O6              | 2.281(1)     | O6 – Mn1 – O7              | 95.54(9)  |
|       | O7              | 2.122(3)     | O6 – Mn1 – O7'             | 84.46(9)  |
|       | $\Sigma S_{ij}$ | 1.864        | O7 – Mn1 – O7              | 180       |
| Mn2   | O2              | 2.235(1)     | O5 – Mn2 – O2              | 88.84(8)  |
|       | O5              | 2.053(2)     | O2 – Mn2 – O2'             | 103.88(9) |
|       | $\Sigma S_{ij}$ | 2.184        |                            |           |
| V1    | O3              | 2.131(2)     | O3 – V1 – O4               | 73.03(7)  |
|       | O4              | 1.8642(8)    | O3 – V1 – O5               | 151.2(1)  |
|       | O5              | 1.663(2)     | O4 – V1 – O6               | 102.91(9) |
|       | O6              | 1.652(3)     | O4 – V1 – O5               | 100.52(8) |
|       | $\Sigma S_{ij}$ | 5.069        | O5 – V1 – O6               | 103.5(1)  |
| V2    | O1              | 1.613(3)     | O1 – V2 – O2               | 104.6(1)  |
|       | O2              | 1.709(2)     | O1 – V2 – O3               | 105.02(8) |
|       | O3              | 1.8784(8)    | O2 – V2 – O3               | 99.25(8)  |
|       | O4              | 1.8642(8)    | O2 – V2 – O4               | 152.4(1)  |
|       | $\Sigma S_{ij}$ | 5.035        | O3 – V2 – O4               | 73.40(7)  |

<sup>a</sup>  $S_{ij} = \exp[(R_0 - R_{ij})/B]$ ,  $B = 0.37$ ,  $R_0 = 1.790$  Å for  $Mn^{II} - O$ ,  $R_0 = 1.803$  Å for  $V^V - O$ .

**Table S2:** A review of Mn-V anodes in Li-ion half-cells, showing the superior cycling performance of **I** in this study compared to similarly prepared electrodes in literature

| Reference in text | Capacity [mAh g <sup>-1</sup> ] | Max Cycle No.   | Rate [mA g <sup>-1</sup> ] | Cutoff Voltage |
|-------------------|---------------------------------|-----------------|----------------------------|----------------|
| 11a <sup>3</sup>  | 460                             | 50              | 100                        | 3.4            |
| 11b <sup>4</sup>  | 245                             | 70              | 0.27-C <sup>b</sup>        | 3.5            |
| 11c <sup>5</sup>  | 450                             | 130             | 0.25-C <sup>b</sup>        | 3.9            |
| 11d <sup>6</sup>  | 500                             | 50 <sup>a</sup> | 100                        | 3.5            |
| 13 <sup>7</sup>   | 500                             | 9 <sup>a</sup>  | ?                          | 3              |
| This work         | 500                             | 300             | 500                        | 3              |

<sup>a</sup> capacity fading; <sup>b</sup> No basis capacity in text to relate C-rate to current

#### Section 4. References

- 1) a) E. D. Dzyuba, L. N. Shchegrov and V. V. Pechkovskii, *Journal of Applied Spectroscopy* 14, 329-332 (1971);  
b) D. de Waal, A. M. Heyns, K. J. Range and C. Eglmeier, *Spectrochimica Acta Part A: Molecular Spectroscopy* 46, 1639-1648 (1990); c) J. Hetmańczyk, Ł. Hetmańczyk, A. Migdał-Mikuli and E. Mikuli, *Journal of Thermal Analysis and Calorimetry* 118, 1049-1056 (2014); d) J. Hetmańczyk, Ł. Hetmańczyk, A. Migdał-Mikuli and E. Mikuli, *Spectrochimica Acta Part A: Molecular and Biomolecular Spectroscopy* 136, 1515-1522 (2015).
- 2) S. Zhang, M. S. Ding, K. Xu, J. Allen, T. R. Jow. *Electrochemical and Solid-State Letters*, 4, 2001, A206-A208.
- 3) Zhang, S., Hu, R., Liu, L. & Wang, D. Hydrothermal synthesis of MnV<sub>2</sub>O<sub>6</sub> nanobelts and its application in lithium-ion battery. *Materials Letters* 124, 57-60, (2014).
- 4) Shuijin, L., Kaibin, T., Yi, J. & Chunhua, C. Preparation of aligned MnV<sub>2</sub>O<sub>6</sub> nanorods and their anodic performance for lithium secondary battery use. *Nanotechnology* 18, 175605 (2007).
- 5) Piffard, Y., Leroux, F., Guyomard, D., Mansot, J. L. & Tournoux, M. The amorphous oxides MnV<sub>2</sub>O<sub>6+δ</sub> (0 < δ < 1) as high capacity negative electrode materials for lithium batteries. *Journal of Power Sources* 68, 698-703, (1997).
- 6) Mario Simoes, Y. S., Songhak Yoon, Corsin Battaglia, Simone Pokrant, Anke Weidenkaff. Hydrothermal vanadium manganese oxides: Anode and cathode materials for lithium-ion batteries. *Journal of Power Sources* 291, 66-74, (2015).
- 7) Hara, D., Ikuta, H., Uchimoto, Y. & Wakihara, M. Electrochemical properties of manganese vanadium molybdenum oxide as the anode for Li secondary batteries. *Journal of Materials Chemistry* 12, 2507-2512 (2002).
